# Supplementary material for: Regulation of the MEI-1/MEI-2 Microtubule-Severing Katanin Complex in Early Caenorhabditis elegans Development
Source: PubMed Central journal article supplement (PMC5068946; doi:10.1534/g3.116.031666), 2016-08-12
Supplement: supp_g3.116.031666_FigureS3.pdf [file supp_g3.116.031666_FigureS3.pdf]

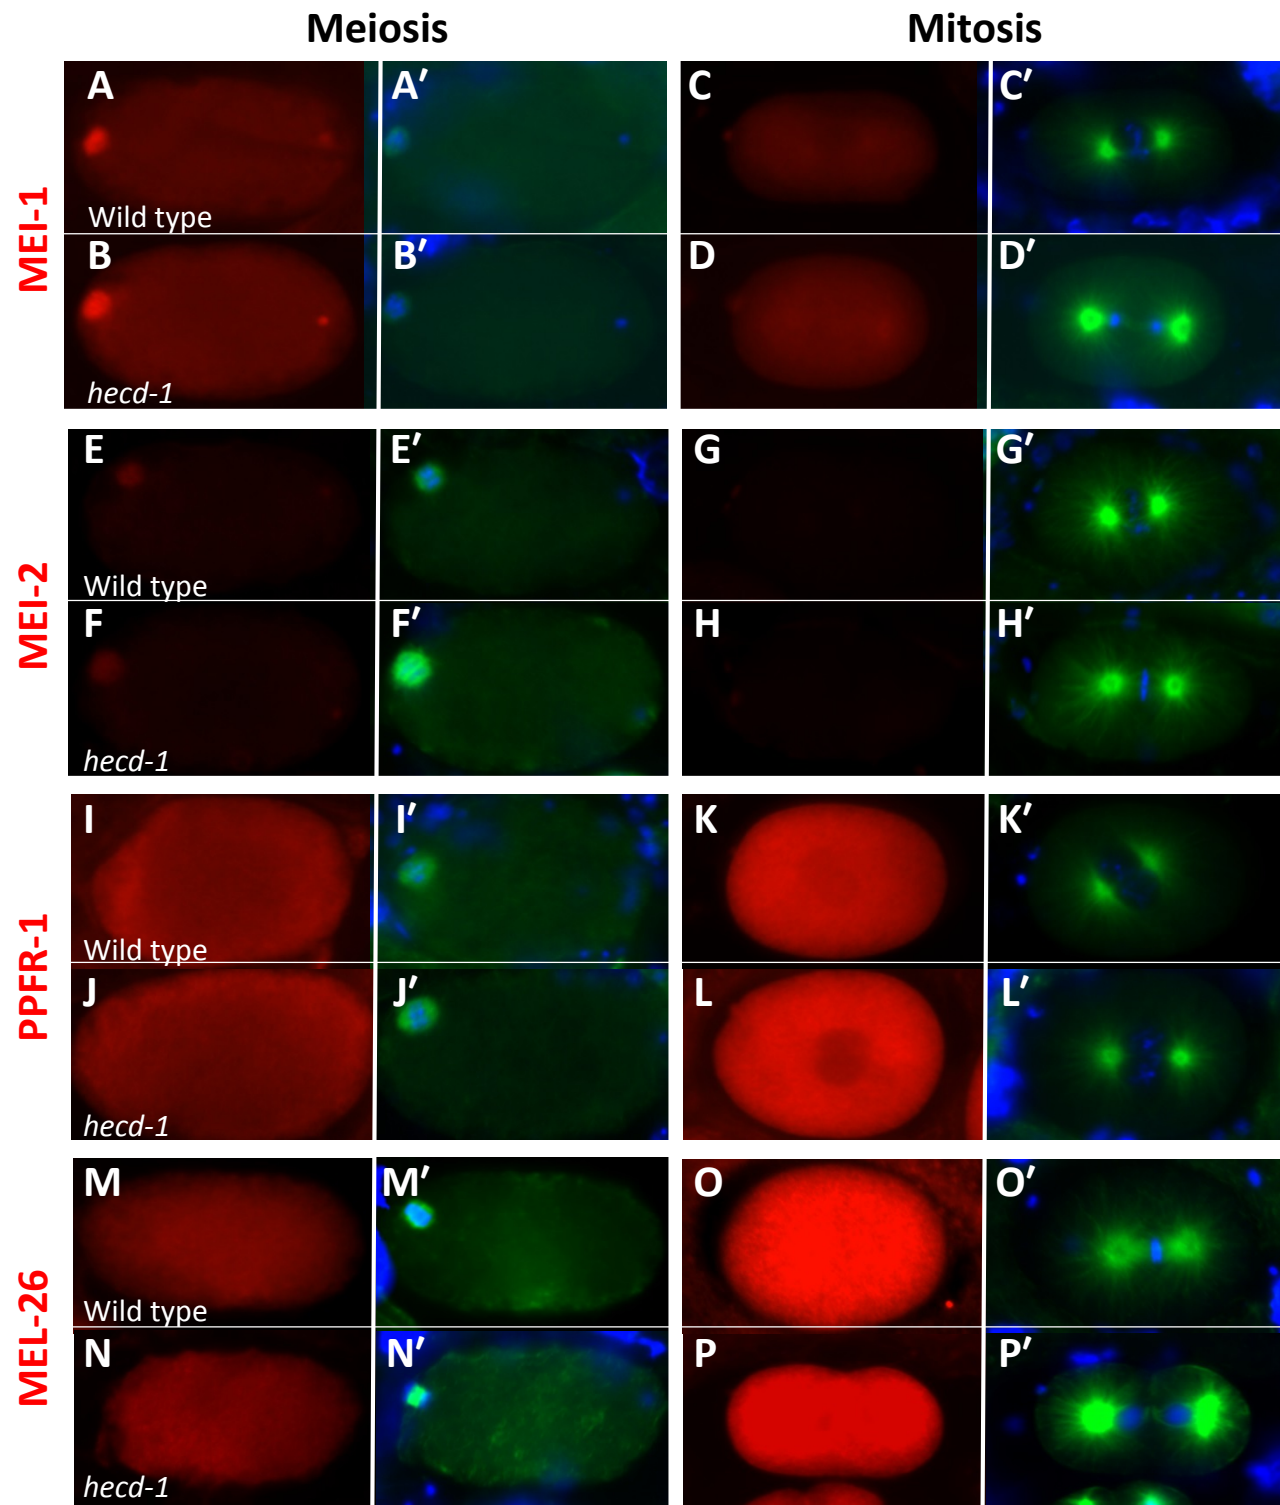

Figure S3

**Figure S3.** *hecd-1* does not alter expression of MEI-1 pathway genes. Wild-type and *hecd-1* embryos were stained with antibodies directed against MEI-1 (A-D), MEI-2 (E-H), PFR-1 (I-L) and MEL-26 (M-P), which are shown in red. The corresponding images marked with prime letters show DAPI (blue) and anti-tubulin (green) in the same embryos. The left pairs are in meiosis and the right pairs are in mitosis. No obvious differences in any genotypes were observed for *hecd-1* beyond changes in relative centrosomal MEI-1 noted in Figure 3.
